# Supplementary material for: Structural basis for receptor-binding domain mobility of the spike in SARS-CoV-2 BA.2.86 and JN.1
Source: PubMed Central journal article supplement — Nat Commun. 2024 Oct 7;15:8574. doi: 10.1038/s41467-024-52808-2 (PMC11458767; doi:10.1038/s41467-024-52808-2), 2024-10-07
Supplement: 41467_2024_52808_MOESM1_ESM.pdf [file 41467_2024_52808_MOESM1_ESM.pdf]

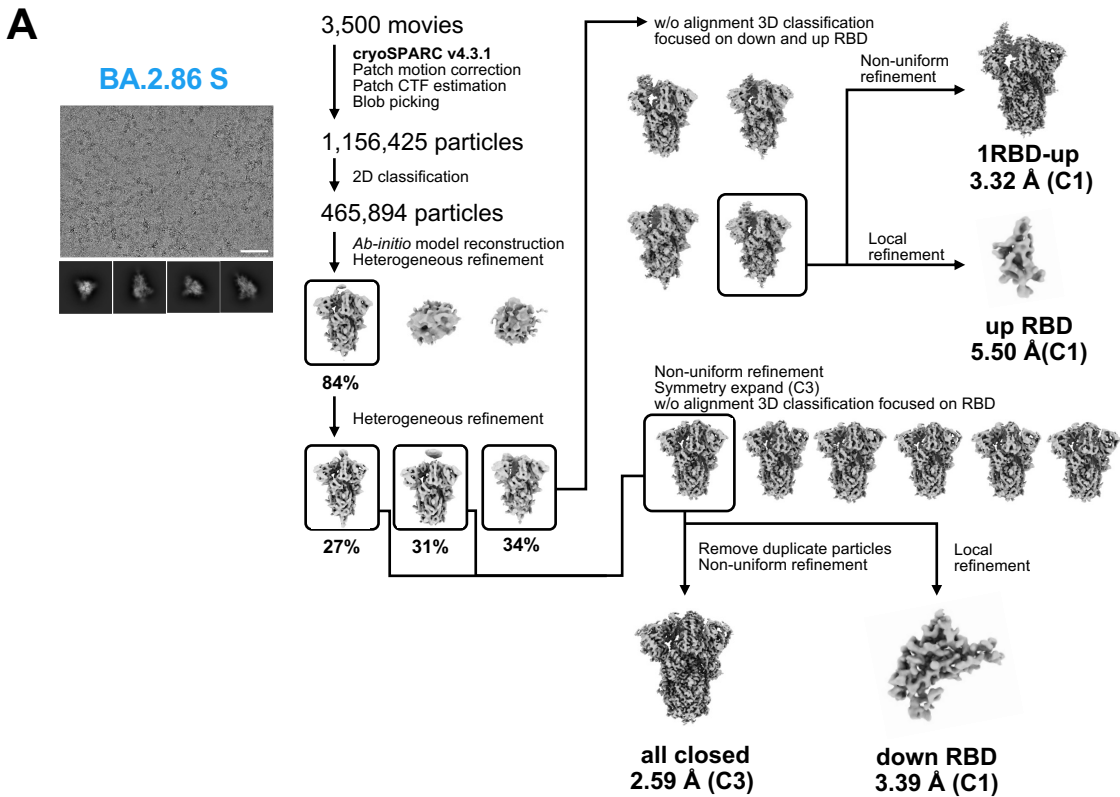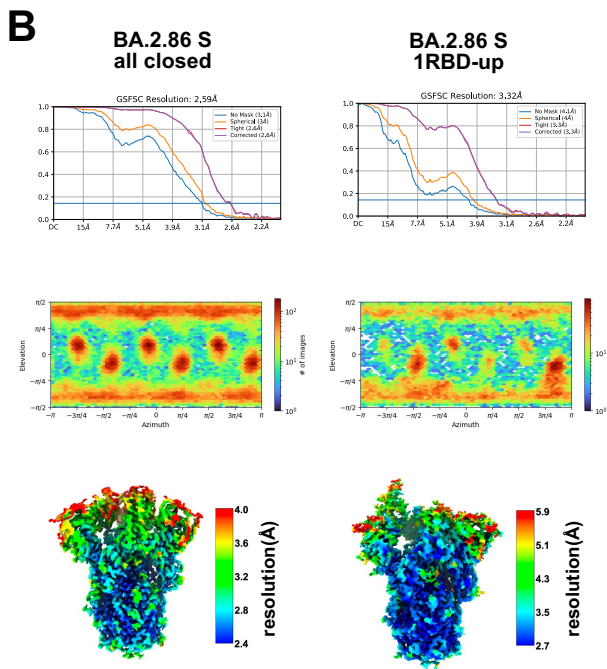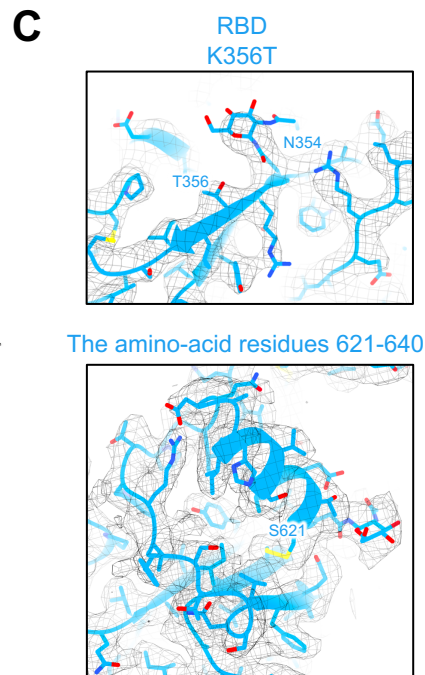

**Supplementary Fig. 1. Workflow of cryo-EM data processing for BA.2.86 S and Cryo-EM maps**  
**(A) Left:** Representative micrograph (scale bars, 50 nm) and 2D class images. **Right:** Cryo-EM data-processing flowchart for BA.2.86 S. **(B) Top:** Global resolution assessment of cryo-EM maps by gold-standard Fourier shell correlation (FSC) curves at the 0.143 criteria. **Middle:** The angular distribution of particles representation by the viewing direction distribution plot. **Bottom:** The calculated values of local resolution are denoted at the grid points of cryo-EM maps. **(C)** Models fit corresponding cryo-EM maps of residues highlighted in **Fig. 1G**.

**A**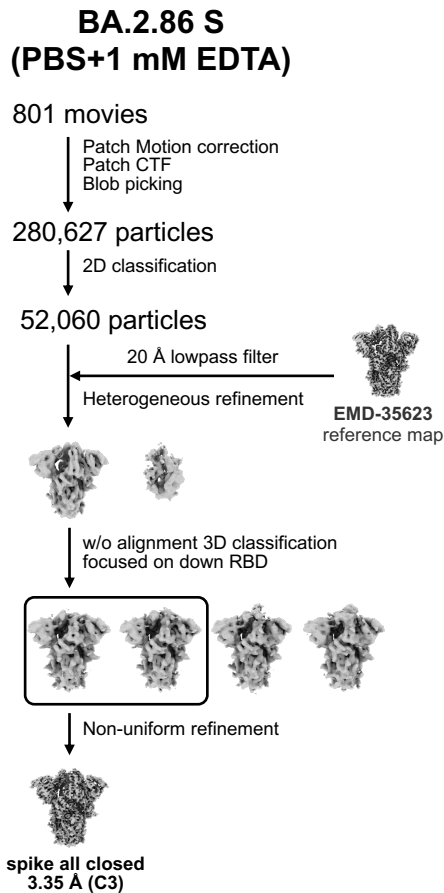**B**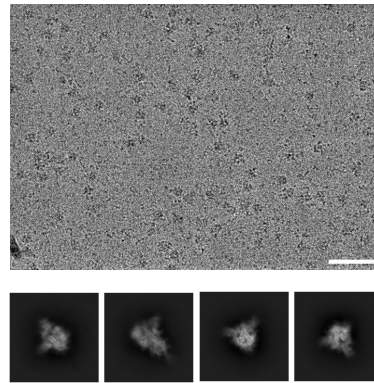**C**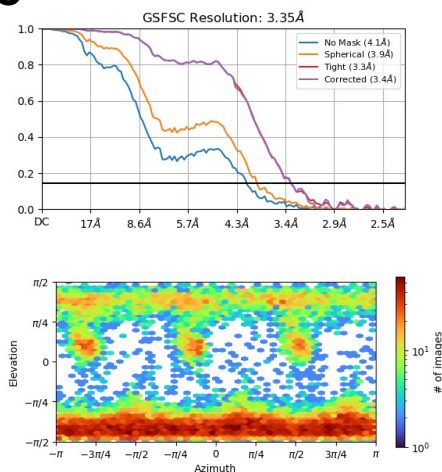**D**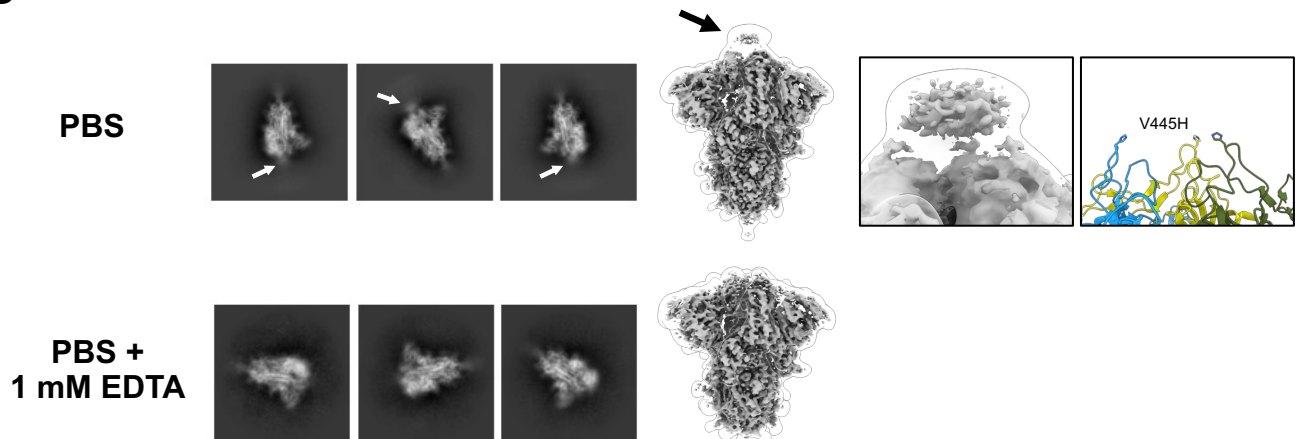

**Supplementary Fig. 2. Workflow of cryo-EM data processing for BA.2.86 S-trimer alone with EDTA and comparison of cryo-EM maps with or without EDTA**  
**(A)** Cryo-EM data-processing workflow for SARS-CoV-2 BA.2.86 S in PBS with 1 mM EDTA. **(B) Top:** Representative micrographs (scale bars, 50 nm); **Bottom:** 2D class images. **(C) Top:** Global resolution assessment of cryo-EM maps using gold standard FSC curves at 0.143 criteria. **Bottom:** The angular distribution of particles representation by the viewing direction distribution plot. **(D)** Comparison of single-particle analysis results for BA.2.86 S-protein in PBS and PBS with 1 mM EDTA. **Left:** 2D classification images. **Middle:** Superimposition of 3D cryo-EM maps and 15 Å low-pass filtered maps. **Right:** Close-up view of the BA.2.86 S-trimer interface of the RBD. The V445H substitution is represented by a stick model; arrows indicate the non-structural noise.

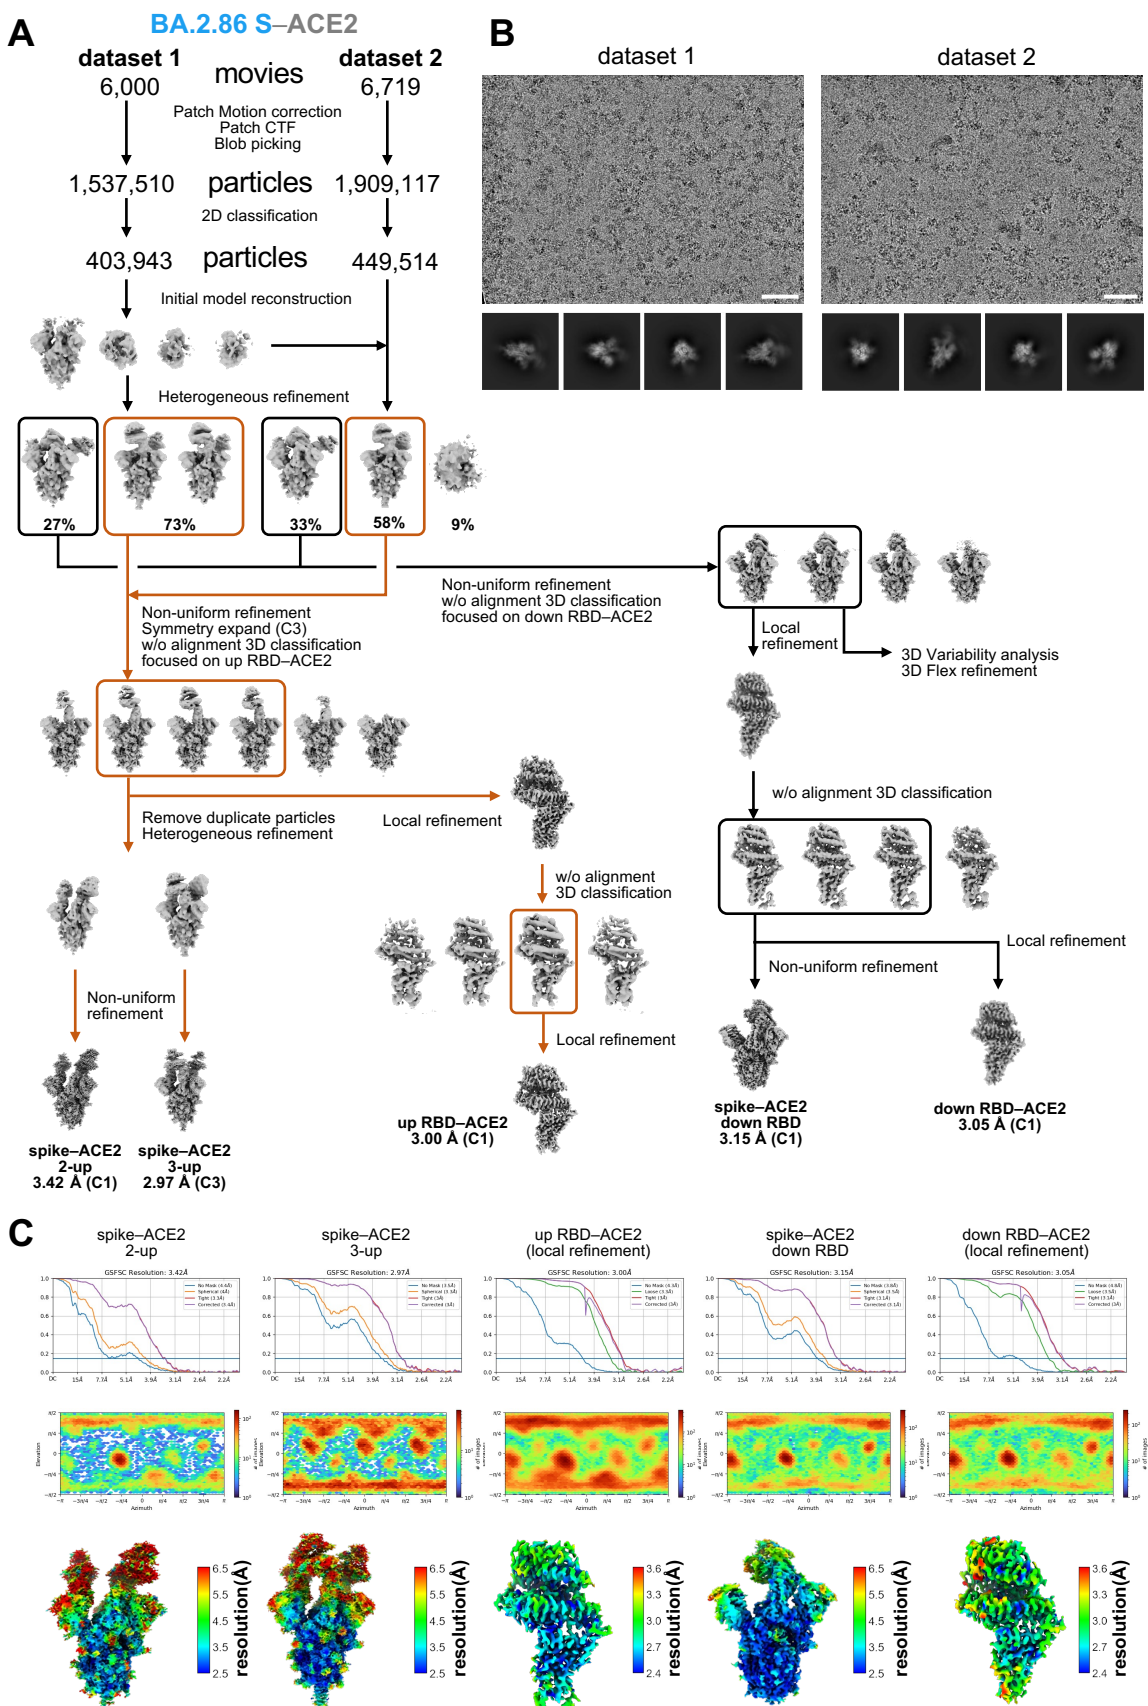

**Supplementary Fig. 3. Workflow of cryo-EM data processing for BA.2.86 S-ACE2 complex**

(A) Cryo-EM data-processing workflow for the SARS-CoV-2 BA.2.86 S-ACE2 complex. (B) **Top**: Representative micrographs (scale bars, 50 nm); **Bottom**: 2D class images. (C) **Top**: Global resolution assessment of cryo-EM maps using gold standard Fourier shell correlation (FSC) curves at 0.143 criteria. **Middle**: The angular distribution of particles representation by the viewing direction distribution plot. **Bottom**: The local resolution appears blue to red in each range.



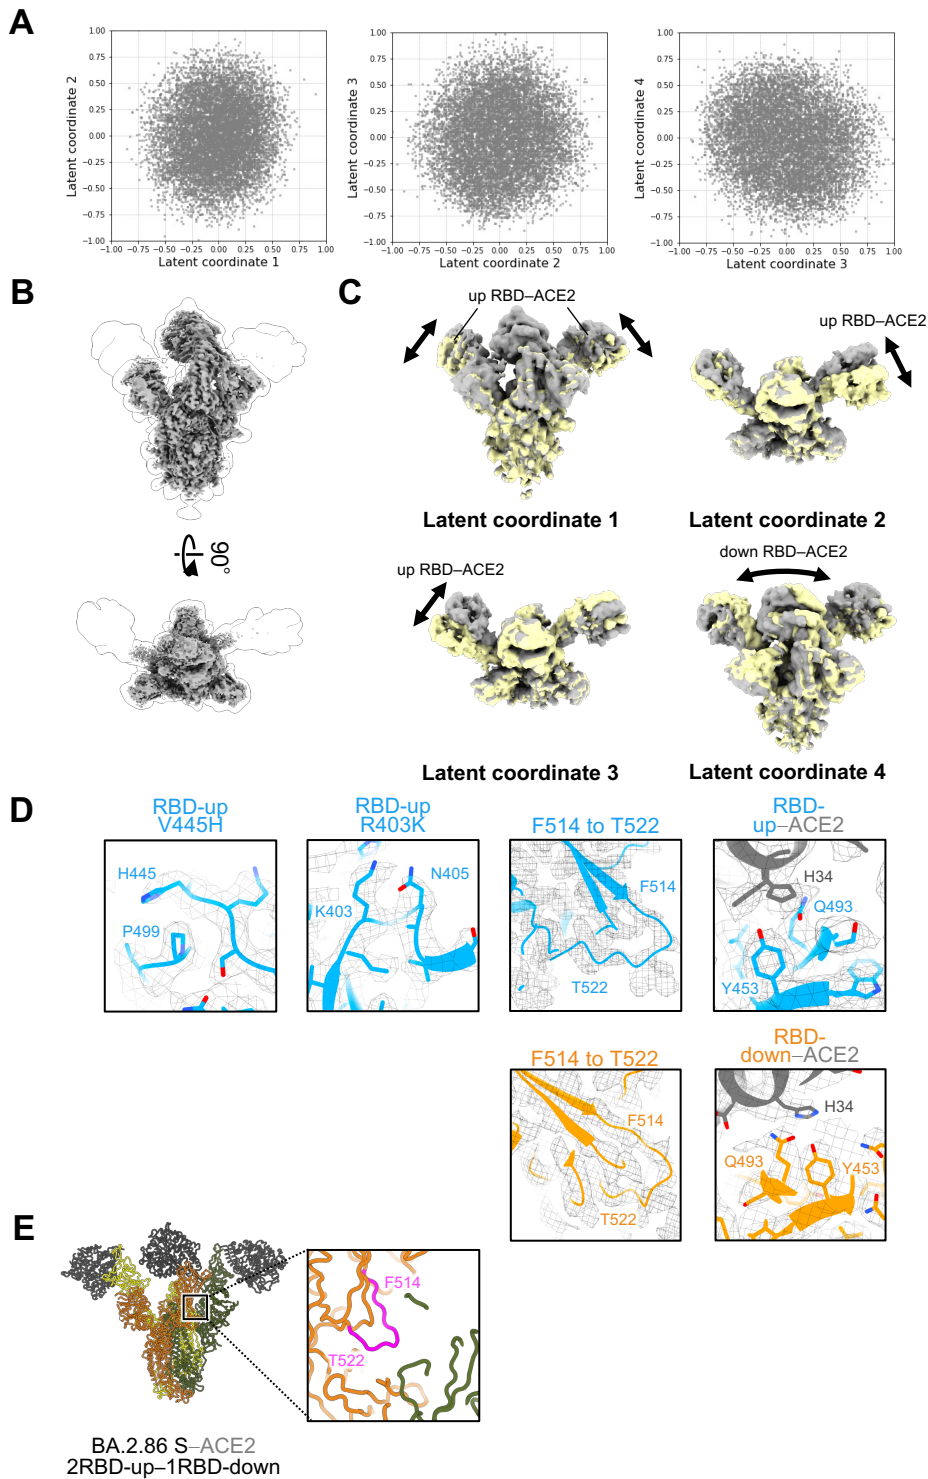

**Supplementary Fig. 4. 3D Flexible on particle images of BA.2.86 S down-RBD bound to ACE2 state, and Cryo-EM maps of the RBD-ACE2 complex**

(A) Scatter plots illustrating the dispersion of particle latent coordinates throughout the dataset of the BA.2.86 S two-up and one-down ACE2 complex. (B) Superimposition of cryo-EM maps for the BA.2.86 S two-RBD-up-one-RBD-down<sub>three ACE2</sub> and its 15 Å low-pass filtered maps. (C) Two representative cryo-EM maps for 3D Flexible refinement training along each of the four latent spaces: the first shows the mobility of two-up RBDs and ACE2; the second and third show the flexibility of one-up RBD and ACE2; the fourth shows all RBDs, including the down RBD-ACE2, as coordinately mobile. (D) Models fit to corresponding cryo-EM maps of specific residues shown in Fig. 3B. (E) The main-chain structure of the two-RBD-up-one-RBD-down<sub>three ACE2</sub> state (S, orange, yellow and dark olive green; ACE2, dark gray). In close-up views, the main chain from F514 to T522 appears magenta.



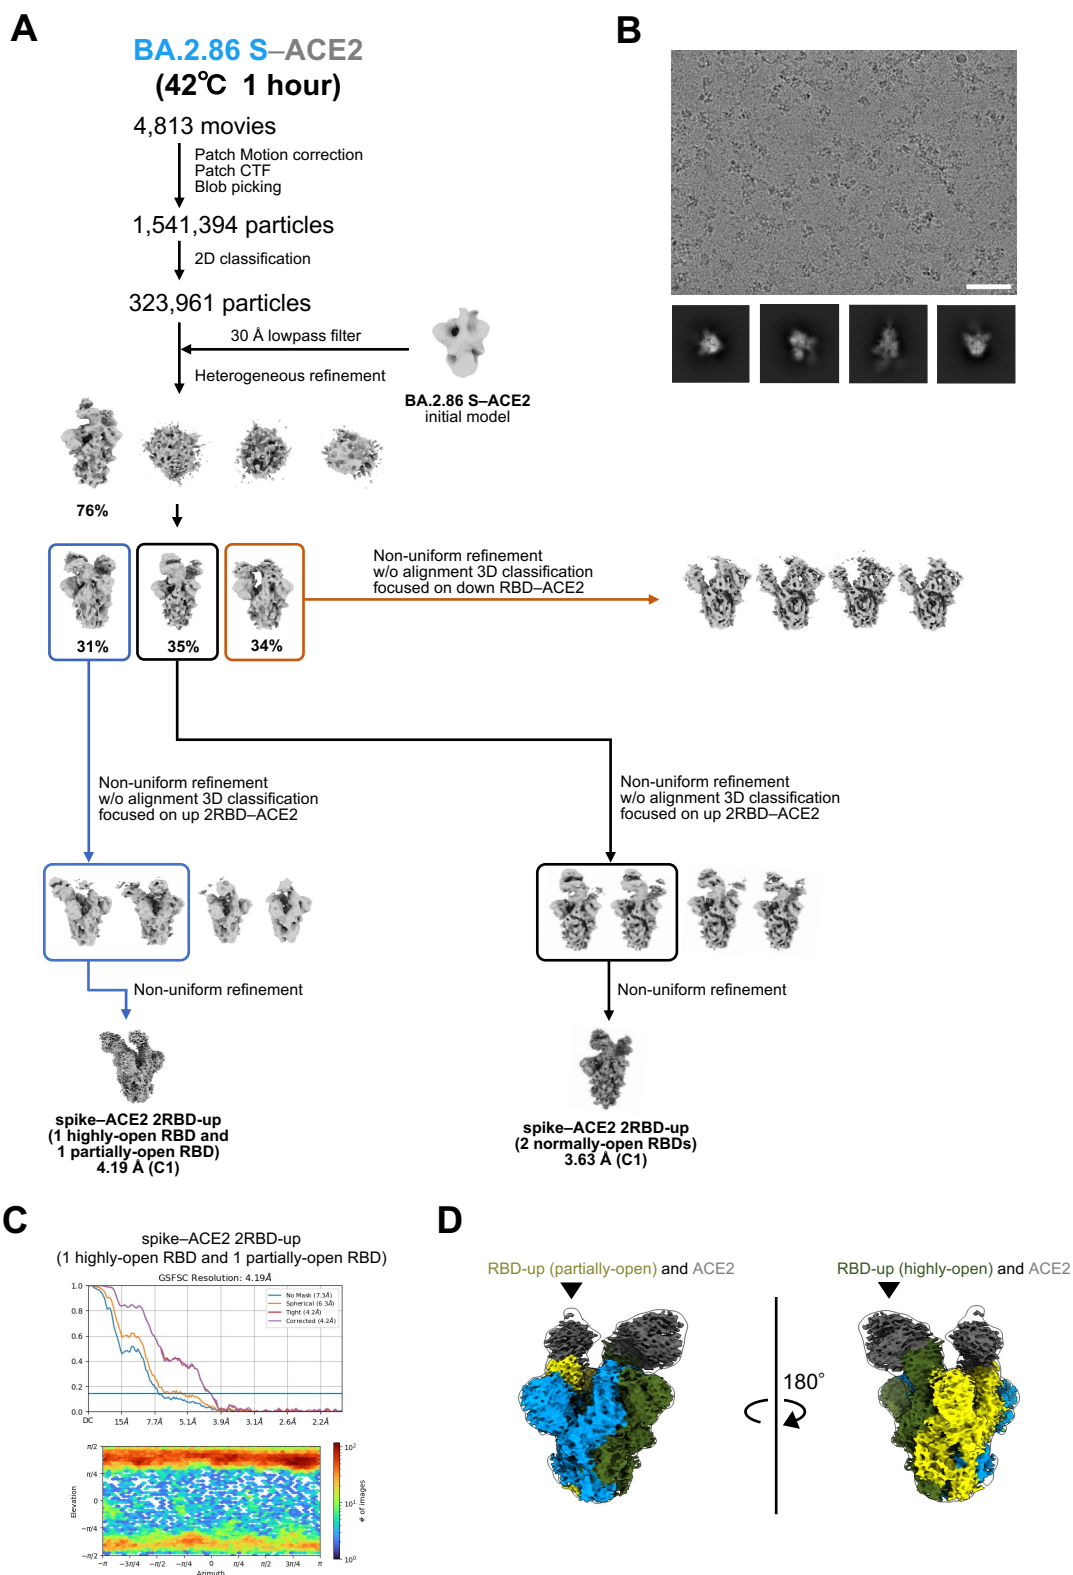

**Supplementary Fig. 5. Workflow of cryo-EM data processing for BA.2.86 S-ACE2 complex treated at 42 ° C for 1 hour**

(A) Cryo-EM data-processing workflow for the SARS-CoV-2 BA.2.86 S-ACE2 complex treated at 42 ° C for 1 hour. (B) **Top**: Representative micrographs (scale bars, 50 nm); **Bottom**: 2D class images. (C) **Top**: Global resolution assessment of cryo-EM maps using gold-standard Fourier shell correlation (FSC) curves at 0.143 criteria. The local resolution appears blue to red in each range. **Bottom**: The angular distribution of particles representation by the viewing direction distribution plot. (D) Cryo-EM map of BA.2.86 S-ACE2 non-canonical two-RBD-up (one-highly-open and one-partially-open; same colors as in Fig. 2).

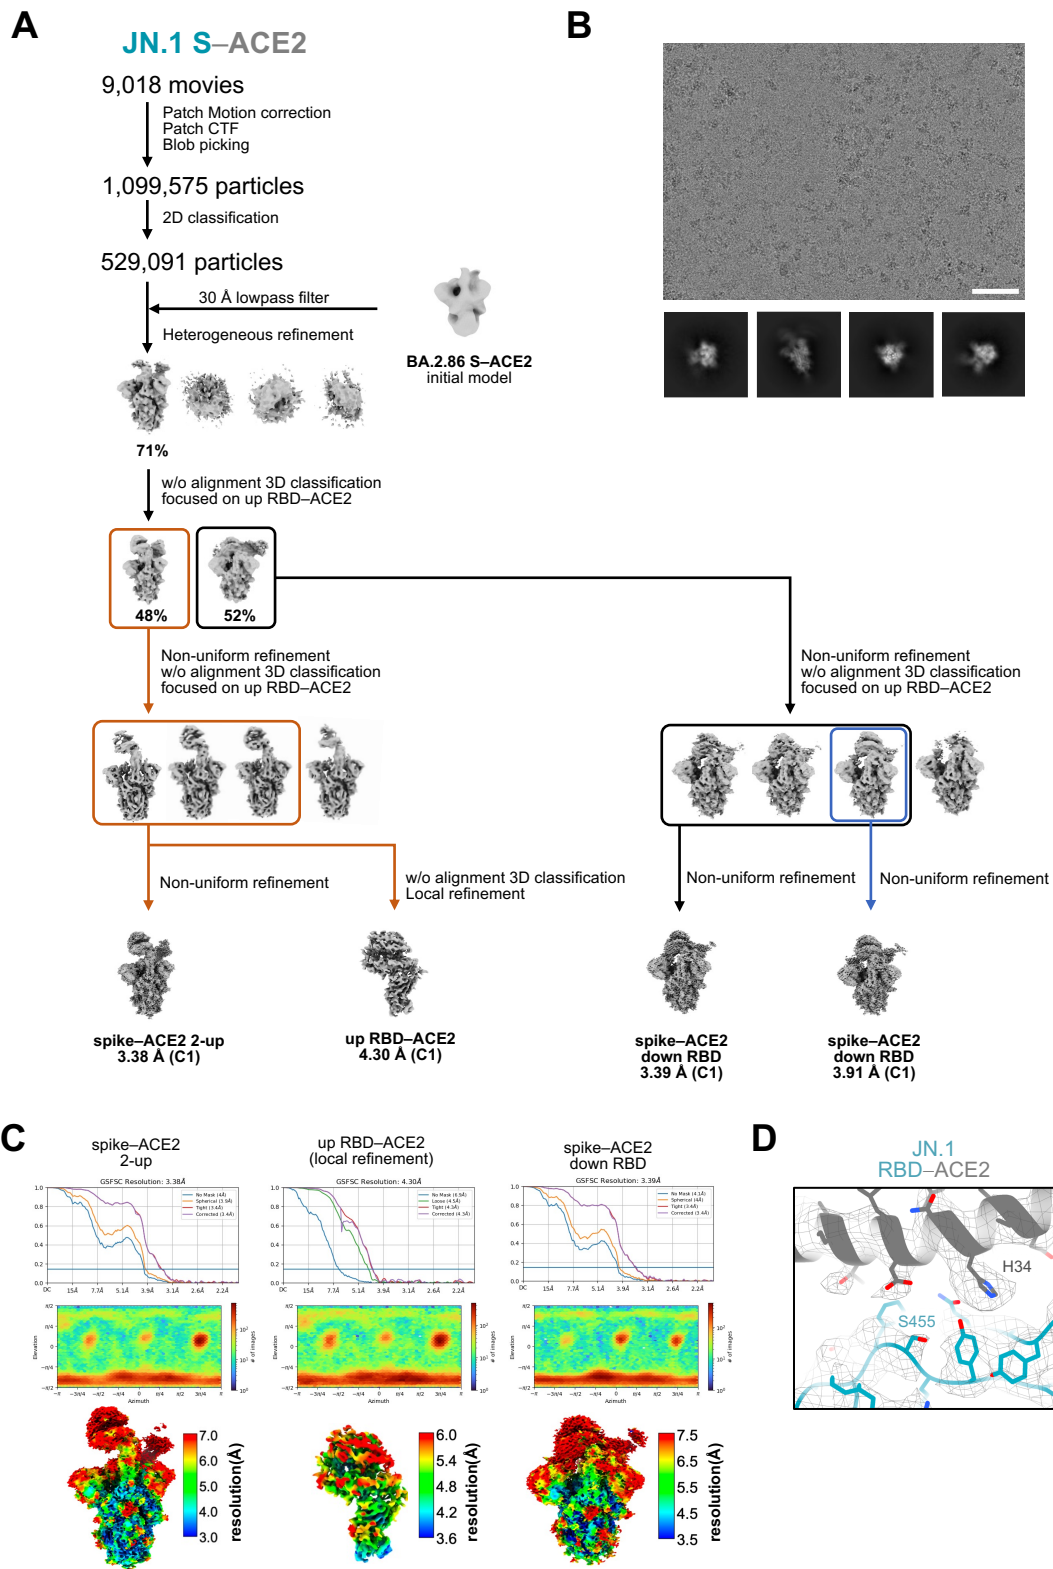

**Supplementary Fig. 6. Workflow of cryo-EM data processing for JN.1 S-ACE2 complex**

(A) Cryo-EM data-processing workflow for the SARS-CoV-2 JN.1 S-ACE2 complex. (B) **Top:** Representative micrographs (scale bars, 50 nm); **Bottom:** 2D class images. (C) **Top:** Global resolution assessment of cryo-EM maps using gold-standard Fourier shell correlation (FSC) curves at 0.143 criteria. **Middle:** The angular distribution of particles representation by the viewing direction distribution plot. **Bottom:** The local resolution appears blue to red in each range. (D) Models fit to corresponding cryo-EM maps of specific residues shown in Fig. 3E.

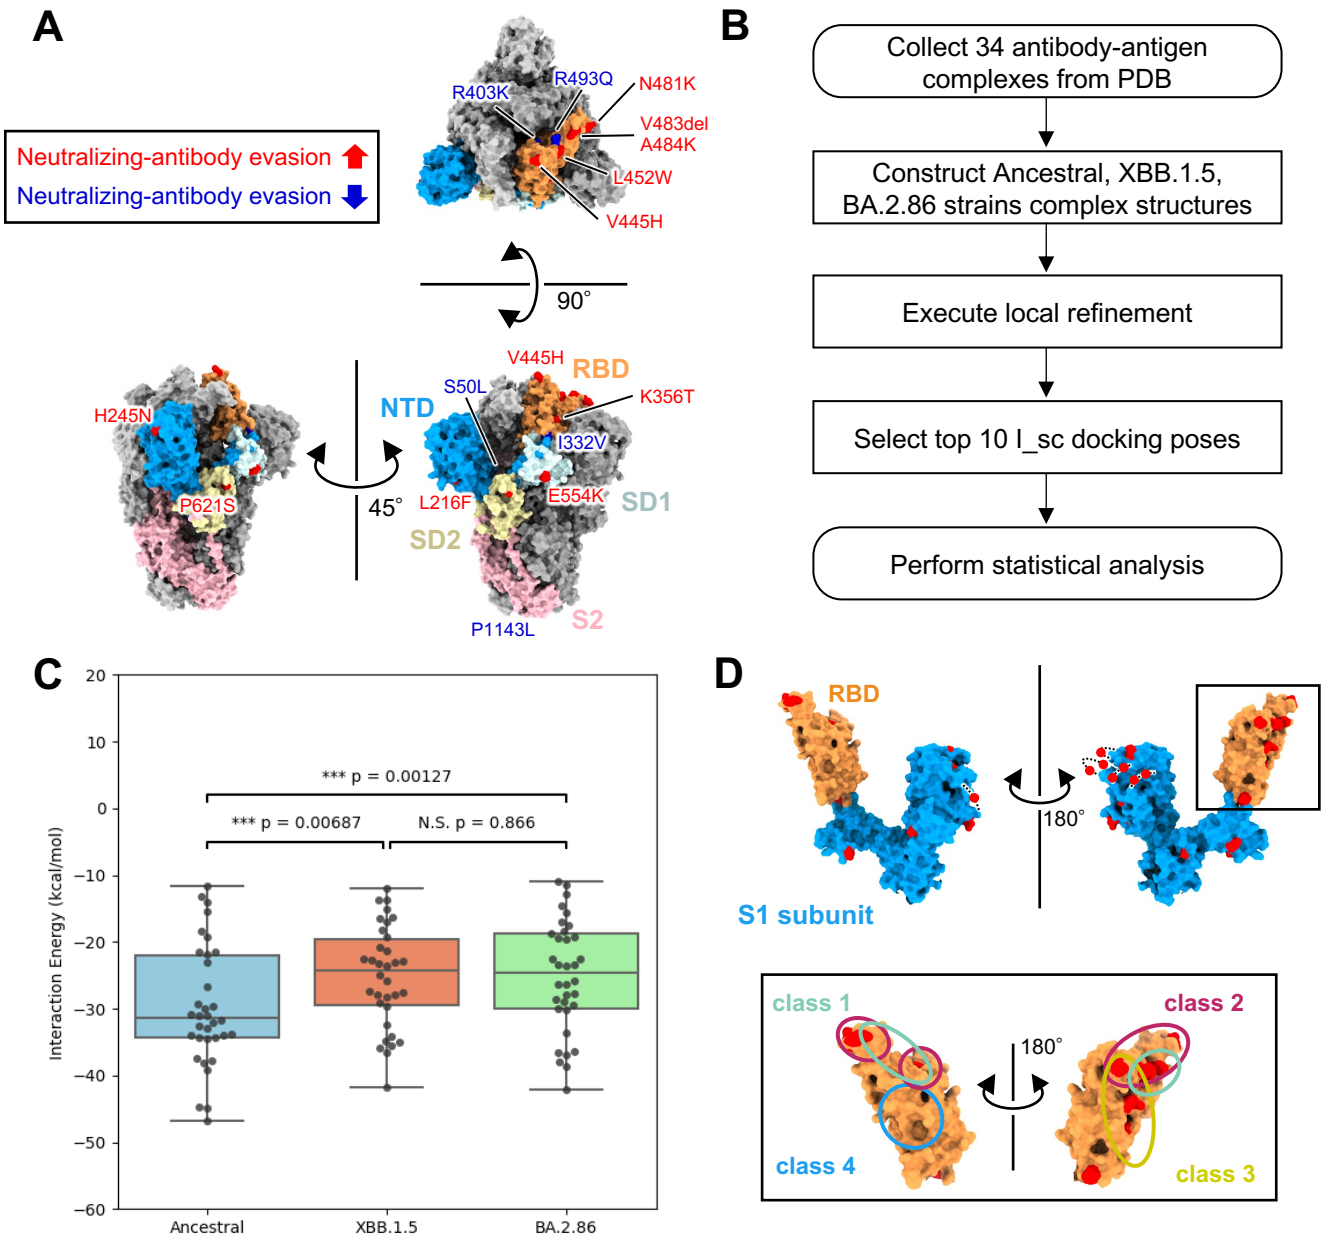

### Supplementary Fig. 7. Potential for neutralizing-antibody evasion by amino-acid substitutions in the BA.2.86 S-protein

(A) Amino-acid substitutions associated with neutralizing-antibody evasion in the BA.2.86 S-protein (NTD; sky blue, RBD; orange, SD1; light blue, SD2; light yellow, S2; light pink). (B) Flowchart for computational evaluation of the neutralizing-antibody binding potential to S-proteins of ancestral strain, XBB.1.5, and BA.2.86. (C) Binding energy between S-proteins of ancestral strain, XBB.1.5, and BA.2.86 and 34 monoclonal antibodies that registered in the PDB. P-values were calculated using the Friedman test followed by a post-hoc Nemenyi test for group comparisons with Python 3.11.5 (\*\* $p < 0.001$ , \*\* $0.001 < p < 0.01$ , \* $0.01 < p < 0.05$ ). (D) Position of amino-acid substitutions in the BA.2.86 S1 subunit compared to that of XBB.1.5. Substitutions highlighted in red.





**(Supplementary Table 1, continued)**

|                                        | SARS-CoV-2 BA.2.86<br>spike-ACE2 (treated at 42°C) |             | SARS-CoV-2 JN.1<br>spike-ACE2 |                              |
|----------------------------------------|----------------------------------------------------|-------------|-------------------------------|------------------------------|
| <b>Data collection and processing</b>  | <b>2-up</b>                                        | <b>2-up</b> | <b>2-up</b>                   | <b>up-RBD ACE2 interface</b> |
| EMDB ID                                | EMD-60905                                          | EMD-60904   | EMD-60906                     | EMD-60886                    |
| PDB ID                                 | -                                                  | -           | -                             | 9IU1                         |
| Microscope                             | Krios G4                                           |             | Krios G4                      |                              |
| Camera                                 | Gatan K3                                           |             | Gatan K3                      |                              |
| energy filter                          | Gatan Biocontinuum                                 |             | Gatan Biocontinuum            |                              |
| slit width                             | 20                                                 |             | 20                            |                              |
| Magnification                          | 130,000                                            |             | 130,000                       |                              |
| Recording mode                         | counting                                           |             | counting                      |                              |
| Voltage (kV)                           | 300                                                |             | 300                           |                              |
| Electron exposure (e-/Å <sup>2</sup> ) | 50.985                                             |             | 51.233                        |                              |
| Exposure time (s)                      | 1.5                                                |             | 1.5                           |                              |
| Number of raw frames                   | 50                                                 |             | 50                            |                              |
| Defocus range (µm)                     | -0.8 to -1.8                                       |             | -0.8 to -1.8                  |                              |
| Pixel size (Å)                         | 0.67                                               |             | 0.67                          |                              |
| Initial particle images (no.)          | 1,541,394                                          |             | 1,099,575                     |                              |
| Final particle images (no.)            | 37,922                                             | 151,272     | 173,979                       | 149,071                      |
| Symmetry imposed                       | C1                                                 | C1          | C1                            | C1                           |
| Map resolution (Å)                     |                                                    |             |                               |                              |
| FSC 0.143                              | 4.19                                               | 3.39        | 3.63                          | 4.30                         |
| <b>Refinement</b>                      |                                                    |             |                               |                              |
| Initial model used (PDB code)          | -                                                  | -           | -                             | 8XV0                         |
| Model composition                      |                                                    |             |                               |                              |
| Protein residues                       | -                                                  | -           | -                             | 790                          |
| Ligands                                | -                                                  | -           | -                             | BMA:2<br>NAG:12, MAN:2       |
| Map CC                                 | -                                                  | -           | -                             | 0.68                         |
| R.m.s. deviations                      |                                                    |             |                               |                              |
| Bond lengths (Å)                       | -                                                  | -           | -                             | 0.002                        |
| Bond angles (°)                        | -                                                  | -           | -                             | 0.512                        |
| Validation                             |                                                    |             |                               |                              |
| MolProbity score                       | -                                                  | -           | -                             | 2.00                         |
| Clashscore                             | -                                                  | -           | -                             | 9.20                         |
| Rotamer outliers (%)                   | -                                                  | -           | -                             | 0.00                         |
| Ramachandran plot                      |                                                    |             |                               |                              |
| Favored (%)                            | -                                                  | -           | -                             | 91.48                        |
| Allowed (%)                            | -                                                  | -           | -                             | 8.52                         |
| Outliers (%)                           | -                                                  | -           | -                             | 0.00                         |

**Supplementary Table 2. Binding energies of monoclonal antibodies to SARS-CoV-2 spike proteins**

| No. | Name1      | Name2        | PDB ID   | PMID     | Ave. I <sub>sc</sub> | Ave. I <sub>sc</sub> | Ave. I <sub>sc</sub> |
|-----|------------|--------------|----------|----------|----------------------|----------------------|----------------------|
|     |            |              |          |          | Ancestral            | XBB.1.5              | BA.2.86              |
| 1   | adg20      | Adintemimab  | 7u2d     | 35487947 | -29                  | -15                  | -16                  |
| 2   | adz8895    | Tixagevimab  | 7l7d     | 34548634 | -39                  | -28                  | -24                  |
| 3   | C144       | Crexavibart  | 8dce     | 36103542 | -32                  | -23                  | -23                  |
| 4   | COV2-2130  | Cilgavimab   | 8d8q     | 36202799 | -33                  | -19                  | -19                  |
| 5   | CT-P59     | Regdanivimab | 7cm4     | 33436577 | -32                  | -25                  | -30                  |
| 6   | HB27       | Upanovimab   | 7cyp     | 34676096 | -19                  | -14                  | -11                  |
| 7   | J08        | Simaravibart | 7sbu     | 35549549 | -38                  | -27                  | -28                  |
| 8   | LY-CoV016  | Etesevimab   | 7c01     | 32454512 | -34                  | -28                  | -26                  |
| 9   | LY-CoV1404 | Bebtelovimab | 7mmo     | 33972947 | -33                  | -23                  | -23                  |
| 10  | LY-CoV555  | Bamlanivimab | 7kmg     | 33820835 | -47                  | -26                  | -20                  |
| 11  | P2B-1G5    | Romlusevimab | 8gx9     | -        | -22                  | -21                  | -23                  |
| 12  | P2C-1F11   | Amubarivimab | 7cdi     | 33431856 | -14                  | -34                  | -34                  |
| 13  | P4A1       | Enuzovimab   | 7cjf     | 33976198 | -45                  | -28                  | -30                  |
| 14  | REGN10933  | Nepuvibart   | 6xdg     | 32540901 | -23                  | -18                  | -18                  |
| 15  | REGN10987  | Masavibart   | 6xdg     | 32540901 | -18                  | -14                  | -15                  |
| 16  | S309       | Sotrovimab   | 7jx3     | 32991844 | -34                  | -35                  | -26                  |
| 17  | STE90-C11  | Timcevimab   | 7b3o     | 34273271 | -30                  | -28                  | -28                  |
| 18  | 10-40      | -            | 7sd5     | 35438546 | -45                  | -42                  | -42                  |
| 19  | A19-46.1   | -            | 7tca     | 35324257 | -15                  | -16                  | -13                  |
| 20  | BD-515     | -            | 7.00E+88 | 34021265 | -31                  | -29                  | -26                  |
| 21  | BD55-4637  | -            | 7wrj     | 36493787 | -22                  | -23                  | -30                  |
| 22  | Beta-54    | -            | 7ps6     | 34921776 | -34                  | -21                  | -29                  |
| 23  | CoV2-2196  | -            | 8d8r     | 36202799 | -31                  | -24                  | -19                  |
| 24  | COVA1-16   | -            | 7jmw     | 33242394 | -34                  | -32                  | -36                  |
| 25  | CR3022     | -            | 6w41     | 32245784 | -34                  | -30                  | -29                  |
| 26  | H4         | -            | 7l58     | 33794145 | -21                  | -16                  | -17                  |
| 27  | Omi-18     | -            | 7zfb     | 35662412 | -31                  | -37                  | -37                  |
| 28  | Omi-3      | -            | 7zf3     | 35662412 | -34                  | -36                  | -39                  |
| 29  | Omi-42     | -            | 7zr7     | 35662412 | -12                  | -12                  | -11                  |
| 30  | SA55       | -            | 7y0w     | 36493787 | -37                  | -36                  | -38                  |
| 31  | SA58       | -            | 7y0w     | 36493787 | -38                  | -35                  | -37                  |
| 32  | XGv051     | -            | 7wtf     | 35672388 | -13                  | -17                  | -18                  |
| 33  | XGv347     | -            | 7wea     | 35090164 | -30                  | -23                  | -19                  |
| 34  | ZCB11      | -            | 7xh8     | 35739114 | -27                  | -23                  | -23                  |



**Supplementary Table 3. Details of human sera used in this study**

| SARS-CoV-2 infected | Donor ID | Sex    | Age | Date of 1st vaccination (YYYY-MM-DD) | Date of 2nd vaccination (YYYY-MM-DD) | Date of 3rd vaccination (YYYY-MM-DD) | Date of 4th vaccination (YYYY-MM-DD) | Date of 5th vaccination (YYYY-MM-DD) | Date of 6th vaccination (YYYY-MM-DD) | Date of test (YYYY-MM-DD) | Date of sampling (YYYY-MM-DD) | Prior infection? |
|---------------------|----------|--------|-----|--------------------------------------|--------------------------------------|--------------------------------------|--------------------------------------|--------------------------------------|--------------------------------------|---------------------------|-------------------------------|------------------|
| XBB.1.5             | 37071    | Female | 48  | 2021-10-01 (P)                       | 2021-11-01 (P)                       | 2022-05-06 (P)                       |                                      |                                      |                                      | 2023-07-15                | 2023-08-11                    | No               |
| XBB.1.5             | 36845    | Male   | 29  | 2021-09-01 (M)                       | 2021-09-29 (M)                       | 2022-05-27 (M)                       |                                      |                                      |                                      | 2023-06-26                | 2023-08-11                    | No               |
| XBB.1.5             | 37229    | Female | 74  | 2021-06-24 (P)                       | 2021-07-15 (P)                       | 2022-02-16 (M)                       | 2022-07-20 (M)                       | 2023-03-25 (M)                       |                                      | 2023-07-17                | 2023-08-01                    | No               |
| XBB.1.5             | 36708    | Male   | 55  | 2021-08-07 (P)                       | 2021-08-27 (P)                       | 2022-04-14 (P)                       |                                      |                                      |                                      | 2023-06-01                | 2023-07-09                    | No               |
| XBB.1.5             | 38084    | Male   | 44  | 2021-09-13 (P)                       | 2021-10-05 (P)                       | 2022-07-29 (M)                       |                                      |                                      |                                      | 2023-08-11                | 2023-09-02                    | No               |
| XBB.1.5             | 37998    | Female | 65  | 2021-08-04 (P)                       | 2021-08-30 (P)                       | 2022-03-19 (M)                       | 2022-09-02 (P)                       | 2022-12-24(PBA.4/5)                  | 2023-06-27 (P)                       | 2023-08-10                | 2023-09-02                    | No               |
| XBB.1.5             | 37798    | Female | 62  | 2021-03-17 (P)                       | 2021-04-09 (P)                       | 2021-12-23 (P)                       | 2022-07-28 (P)                       | 2023-06-17 (P)                       |                                      | 2023-08-03                | 2023-08-20                    | No               |
| XBB.1.5             | 38061    | Female | 55  | 2021-08-17 (P)                       | 2021-09-18 (P)                       | 2022-04-02 (M)                       | 2022-10-14(PBA.1)                    |                                      |                                      | 2023-08-11                | 2023-09-04                    | No               |
| XBB.1.5             | 38019    | Female | 18  | 2021-09-07 (P)                       | 2021-10-07 (P)                       | 2022-04-28 (P)                       | 2022-12-27 (P)                       |                                      |                                      | 2023-08-10                | 2023-09-04                    | No               |
| XBB.1.5             | 38952    | Female | 54  | 2021-07-27 (M)                       | 2021-08-24 (M)                       | 2022-03-24 (P)                       | 2022-10-26 (P)                       |                                      |                                      | 2023-08-23                | 2023-09-10                    | No               |

P, Pfizer-BioNTech; M, Moderna

**Supplementary Table 4. Primers used in this study**

| Target region | Primer name          | Primer sequence (5'-to-3')                | Purpose                             |
|---------------|----------------------|-------------------------------------------|-------------------------------------|
| S protein     | Omicron universal Fw | cactatagggcgaatgggtaccatggttggtcctggt     | Preparation of S expression plasmid |
|               | BA.2 WT Rv           | agctccaccgcggtggcgccgctcagggtagtagcagttca | Preparation of S expression plasmid |
|               | BA.2.86 K356 Fw      | aggaagaggattagcaactgt                     | Preparation of S expression plasmid |
|               | BA.2.86 K356 Rv      | cctctcctgttccaggcata                      | Preparation of S expression plasmid |
|               | BA.2.86 V445 Fw      | aaggtagcggcaactacgac                      | Preparation of S expression plasmid |
|               | BA.2.86 V445 Rv      | gtcacctgctgtccagctt                       | Preparation of S expression plasmid |
|               | BA.2.86 P621 Fw      | gtgcctgtggctatccatgct                     | Preparation of S expression plasmid |
|               | BA.2.86 P621 Rv      | cacaggcacctcagtagctt                      | Preparation of S expression plasmid |
|               | BA.2.86_N354Q Fw     | tctgtctatgcctggcagaggaccaggattagc         | Preparation of S expression plasmid |
|               | BA.2.86_N354Q Rv     | gctaatcctggtcctctgccaggcatagacaga         | Preparation of S expression plasmid |
